# Supplementary material
Source: ML conference proceedings conference paper supplement (https://openreview.net/forum?id=hqC6aBE1Ow)

# Supplementary Materials: Unraveling Motion Uncertainty for Local Motion Deblurring

Anonymous Authors

## OVERVIEW

This supplementary document is organized as follows:  
Section 1 provides more ablation results.

## 1 MORE RESULTS

**MUGNet without the mask prediction loss.** The mask prediction loss serves as a crucial training loss for MUGNet, imposing constraints on mask estimation. Upon removing the mask loss and retraining MUGNet, we attain a performance with PSNR/SSIM

scores of 36.28/0.9319. A visual examination of the estimated masks showcases high accuracy, confirming the efficacy of the MUQ module.

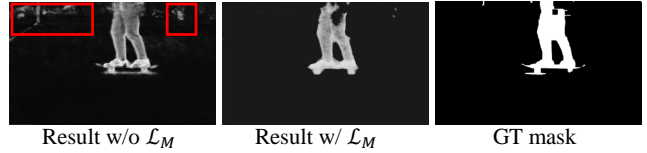

Supplement: supplementary_material [file attachment]
